# Supplementary material for: Temporal Trends in Colorectal Cancer Screening among Asian Americans
Source: Oxford University Press journal article supplement (doi:10.1158/1055-9965.epi-15-1147), 2016-04-08
Supplement: 10559965epi151147-sup-157572_1_supp_3371972_j3090j.docx [file 10559965epi151147-sup-157572_1_supp_3371972_j3090j.docx]

| **Supplemental Table 2. Unadjusted and Adjusted Prevalence Ratios and 95%CI of Up-to-Date CRC Screening for Routine Reasons Among Adults 50-75 years by Asian Subgroup and Survey Year, CHIS 2007-2009a,b** | | | | | | | |
| --- | --- | --- | --- | --- | --- | --- | --- |
|  | **AA vs NHW** | **CHINESE vs Japanese** | **KOREAN vs Japanese** | **FILIPINO vs Japanese** | **S.ASIAN vs Japanese** | **VIETNAMESE vs Japanese** | **SE/CAMB/OTH vs Japanese** |
| **Unadjusted PR and 95%CI** | | | | | | | |
| **2007** | **0.89 (0.83, 0.95)** | **0.81 (0.67,0.98)** | **0.73 (0.55,0.96)** | 1.01 (0.82,1.25) | 0.89 (0.68,1.17) | 0.84 (0.66,1.07) | 0.81 (0.56,1.17) |
| **2009** | 0.92 (0.84, 1.01) | 1.13 (0.93, 1.38) | 0.88 (0.67, 1.15) | 0.97 (0.74,1.27) | 0.96 (0.73, 1.26) | 0.90 (0.57,1.42) | 0.94 (0.62,1.41) |
| **Adjusted PR and 95%CI** | | | | | | | |
| 2007 | 1.01 (0.93 - 1.1) | 0.95 (0.74 - 1.22) | 0.98 (0.72 - 1.33) | 1.02 (0.77 - 1.35) | 0.92 (0.64 - 1.32) | 1.26 (0.96 - 1.66) | 0.98 (0.69 - 1.41) |
| 2009 | 1.01 (0.93 - 1.09) | 1.21 (0.98 - 1.49) | 0.96 (0.71 - 1.29) | 1.02 (0.79 - 1.31) | 0.94 (0.66 - 1.35) | 1.25 (0.98 - 1.6) | 1.04 (0.69 - 1.56) |
| Adjusted for: age, sex, marital status, educational attainment, language spoken at home, percent of lifetime spent in US, insurance type/status, healthcare utilization, and income | | | | | | | |
| Asian vs NHW model includes 39,265 (NHW: 35,350; Asians: 3,915 - including 27 Asians with no defined subgroup) | | | | | | |  |
| Asian subgroup model includes 3,888 persons | | |  |  |  |  |  |
