# Supplementary material for: Temporal Trends in Colorectal Cancer Screening among Asian Americans
Source: Oxford University Press journal article supplement (doi:10.1158/1055-9965.epi-15-1147), 2016-04-08
Supplement: 10559965epi151147-sup-157572_1_supp_3371973_830908.docx [file 10559965epi151147-sup-157572_1_supp_3371973_830908.docx]

|  | | | **NHW** | | | **AA** | | | **P-value comparing NHW vs. AA** |
| --- | --- | --- | --- | --- | --- | --- | --- | --- | --- |
|  | | | % | 95%CI | | % | 95%CI | |
| **Overall Up-to-Datea** | | | |  |  |  |  |  |  |
| 2012 | | | 73.0 | 71.2 | 74.7 | 72.7 | 65.0 | 79.3 | 0.944 |
| 2014 | | | 72.6 | 70.0 | 75.0 | 70.7 | 60.5 | 79.1 | 0.702 |
|  | | |  |  |  |  |  |  |  |
| **Colonoscopy in the past 10 yearsb** | | | | | |  |  |  |  |
| 2012 | | | 62.7 | 60.7 | 64.6 | 56.2 | 47.5 | 64.4 | 0.146 |
| 2014 | | | 63.3 | 60.5 | 66.0 | 55.7 | 44.4 | 66.4 | 0.207 |
|  | | |  |  |  |  |  |  |  |
| **FOBT in the past yearc** | | | | |  |  |  |  |  |
| 2012 | | | 20.6 | 19.1 | 22.1 | 22.8 | 16.7 | 30.3 | 0.536 |
| 2014 | | | 19.5 | 17.5 | 21.7 | 25.8 | 17.4 | 36.3 | 0.214 |
|  | | |  |  |  |  |  |  |  |
| Abbreviations: Non-Hispanic White (NHW), Asian American (AA) | | | | | | | | |  |
|  |  |  |
| NHW n=6,094 (2012=4,075. 2014=2,019); AA n=346 (2012=212. 2014=134) | | | | | | | | | |
| b. NHW n=5,647 (2012=3,770. 2014=1,877); AA n=319 (2012=198. 2014=121) | | | | | | | | | |
| c. NHW n=6,203 (2012=4,124. 2014=2,079); AA n=361 (2012=220. 2014=141) | | | | | | | | | |

**Supplemental Table 3. CRC Screening Prevalence and 95%Confidence Interval Among Adults 50-75 in California, BRFSS 2012-2014**
