# Supplementary material for: Temporal Trends in Colorectal Cancer Screening among Asian Americans
Source: Oxford University Press journal article supplement (doi:10.1158/1055-9965.epi-15-1147), 2016-04-08
Supplement: 10559965epi151147-sup-157572_1_supp_3385170_h3flvy.xlsx [file 10559965epi151147-sup-157572_1_supp_3385170_h3flvy.xlsx]

## Sheet: Supplemental Table1
Supplemental Table 1. FOBT, Sigmoidoscopy, and Colonoscopy Use Among Non-Hispanic Whites and Asian American Subgroups Aged 50-75 Years over Time, CHIS 2003-2009
	Non-Hispanic White			Asian American Combined			Chinese			Japanense			Korean			Filipino			South Asian			Vietnamese			SE/CAMB/OTH/MULT
	%	95% CI		%	95% CI		%	95% CI		%	95% CI		%	95% CI		%	95% CI		%	95% CI		%	95% CI		%	95% CI
FOBT/FIT in the Past Year
2003	19.5	18.6	20.3	14.3	12	17	15.7	12	20.3	20.1	12.6	30.5	8.2	4.6	14.2	9.8	6.2	15.1	8.8*	3.6	20.1	17.6	10	28.9	33.1	17.9	52.9
2005	19.3	18.6	20.1	13.8	11.7	16.3	15.9	12.8	19.5	18.4	11.6	27.9	1.5*	0.7	3.3	16.3	11.4	22.8	11.2*	5.3	22.2	9.4	5.1	16.6	22.6*	10.4	42.5
2007	23.1	22	24.2	22.2	19.7	24.8	21.3	16.7	26.7	20	13.5	28.5	12.5	8.2	18.5	25.4	19.5	32.5	22.4	13.1	35.5	26.1	19.5	34.1	16.4*	8	30.7
2009	24.5	23.3	25.8	25.7	21.9	29.8	25.1	19.4	31.8	20.8	13.4	30.8	20.6	14.2	28.8	29.4	21.2	39.2	17.7	11.1	26.8	26.5	18.2	36.9	35.7	18.2	58.1
Sigmoidoscopy in the past 5 Years
2003	22.9	21.7	24.1	14.3	11.7	17.4	14.4	10.7	19.1	34.6	24.5	46.2	6.2*	2.5	14.9	12.8	7.7	20.5	8.1*	3.2	18.7*	9.1	4.6	17.2	14.3*	5.4	32.6
2005	22	21	23	16	13	19.6	15	10.7	20.6	20.1	10.8	34.4	11	7.6	15.6	16.1	10	25	14.0*	6.1	29.1*	21.5	13.6	32.2	10.9*	4.4	24.5
2007	16.7	15.7	17.6	15.4	13.3	17.7	13.1	10.4	16.5	17.8	12.6	24.6	6.9	3.9	11.8	17.3	12.6	23.4	14.8	8.1	25.7	22	15.1	30.9	16.7	8.5	30.2
2009	14	13	15.1	14	10.8	17.8	15.7	10.7	22.4	9.5	5.3	16.4	4.3	2.3	8	15.8	10	24.1	11	5.6	20.6	17.6	9.4	30.6	12.1	4.6	28.2
Colonoscopy in the Past 10 years
2003	40.2	39	41.5	26.2	22.7	30	24.1	18.2	31.2	35	26.1	45.1	21.3	13.3	32.4	28.8	21.2	37.8	14.7*	7	28.4*	27.7	20.2	36.7	38.8*	18.8	63.3
2005	50.4	49.1	51.6	35.6	31.8	39.5	39	33	45.3	53.4	42.4	64.1	20	13.5	28.5	33.7	25.2	43.4	32.8	19	50.5	36.5	25.3	49.3	22.8	12.2	38.6
2007	46.2	45.1	47.3	42.3	39.4	45.3	40.1	35	45.4	49.3	40.9	57.7	44.3	35	54	49.5	40.8	58.2	39.4	28.8	51.2	29.6	21.1	39.7	26.4	14.6	43
2009	55.3	53.9	56.7	47	42.7	51.4	53.5	45.8	60.9	55.7	46.7	64.3	50.4	38.7	62.1	41.9	32.2	52.3	46.7	33.1	60.8	42.4	30.9	54.8	32.9	19.3	50.1
Up-to-Date with CRC screening
2003	58.1	56.8	59.4	43.3	39.5	47.2	44.5	37.8	51.5	56	46.2	65.3	30.7	21.8	41.3	41.8	34.1	50	28.2	16.4	44	44.9	34.3	56	62.9*	43.4	79
2005	63.6	62.5	64.7	49.5	46.1	52.9	50.9	45.1	56.6	66.5	56.8	74.9	27.9	21.5	35.3	50.8	41.6	59.9	43.9	27.5	61.9	52.3	42.2	62.2	42.1	27.8	57.9
2007	64.2	63	65.4	58.1	55	61.2	55.2	49.7	60.7	66	56.8	74.1	52.2	43.4	60.9	64.3	56.3	71.5	55.9	43.6	67.4	53.5	43.2	63.4	46.9	32	62.4
2009	71.4	69.9	72.9	64.6	60.1	68.8	69.6	62.4	75.9	68.2	59.3	75.9	59.5	47.7	70.3	61.6	51.4	70.8	58.4	43.8	71.7	70	59.5	78.8	55.6	35.8	73.7
*Relative Standard Error >30% or demoniator is <50, leading to an unrealiable estimate
Abbreviations Non-Hispanic White (NHW), Southeast (SE), Cambodian (CAMB), Other (OTH), Fecal Immunochemical Test (FIT), Fecal Occult Blood Test (FOBT)
